# Supplementary material
Source: PubMed Central journal article supplement (PMC4936555)
Supplement: supp_pp.16.00246_PP2016-00246DR1_Supplemental_Figures.pdf [file supp_pp.16.00246_PP2016-00246DR1_Supplemental_Figures.pdf]

1 **Supplementary Figures**

2

3 **Title: Superoxide and singlet oxygen produced within the thylakoid membranes both**  
4 **cause photosystem I photoinhibition**

5 Running title: The photoinhibition mechanism in Photosystem I

6

7 **Authors**

8 Daisuke Takagi, Shigeo Takumi, Masaki Hashiguchi, Takehiro Sejima, Chikahiro  
9 Miyake\*

10

11 **Author's address**

12 Department of Biological and Environmental Science, Graduate School of Agricultural  
13 Science, Kobe University, 1-1 Rokkodai, Nada, Kobe, 657-8501 Japan (D.T., S.T.,  
14 M.H., T.S., C.M.)

15 Core Research for Environmental Science and Technology, Japan Science and  
16 Technology Agency, 7 Gobancho, Chiyoda-ku, Tokyo 102-0076, Japan (C.M.)

17

18 \*For correspondence

19 Corresponding author: Chikahiro Miyake

20 (fax; +81-78-803-5851, [cmiyake@hawk.kobe.u-ac.jp](mailto:cmiyake@hawk.kobe.u-ac.jp))

21

22

23

24

25

26

27

28

29

30

31

32

33

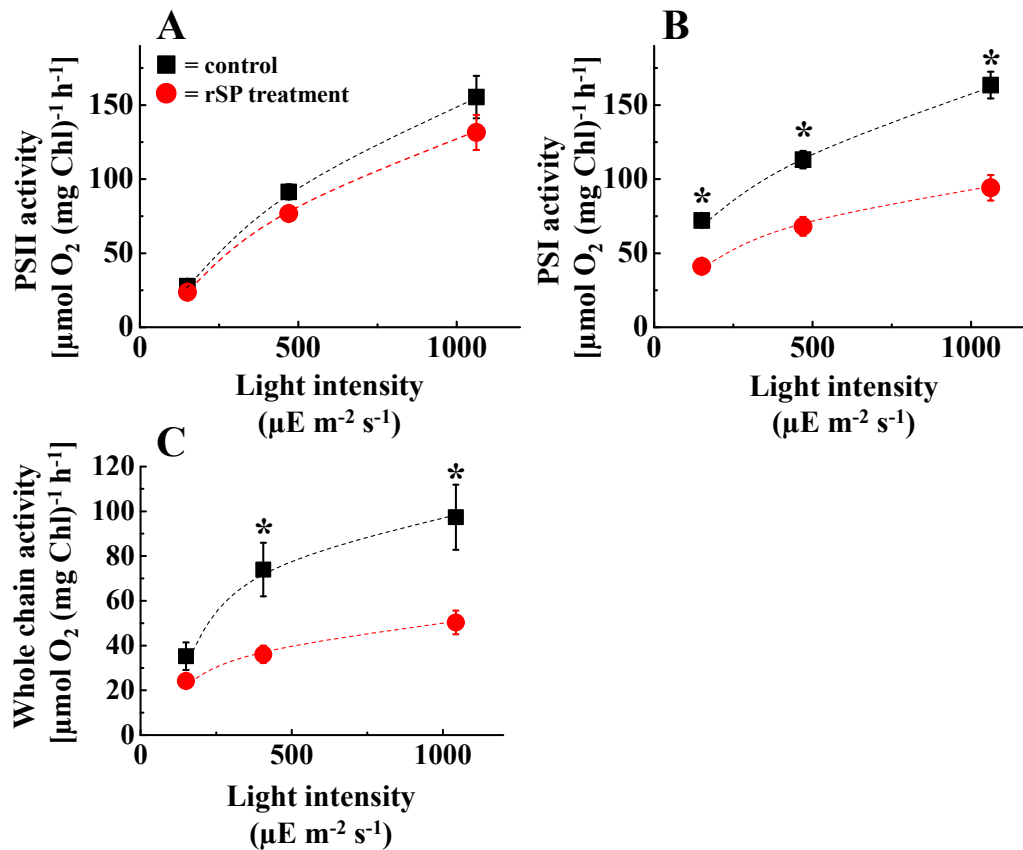

34

35

36 **Supplemental Figure S1**

37 The light response of PSII (A), PSI (B), and whole-chain photosynthetic electron

38 transport activity (C) in isolated chloroplasts. The reaction mixture contained  $30 \mu\text{g ml}^{-1}$

39 isolated chloroplasts, and the reaction mixture was maintained at  $25^\circ\text{C}$ . Photosynthetic

40 electron activities were measured using an  $\text{O}_2$  electrode (see Materials and Methods).

41 Black square indicates photosynthetic electron activities of the control sample that was

42 kept in the dark for 1 h. Red circle indicates photosynthetic electron activities of

43 samples that were processed by SP treatment for 1 h. Data are expressed as the mean  $\pm$

44 SEM of three independent experiments. Asterisks indicate a significant difference

45 between the control sample and the rSP treatment sample (Student's *t*-test,  $p < 0.05$ ).

46

47

48

49

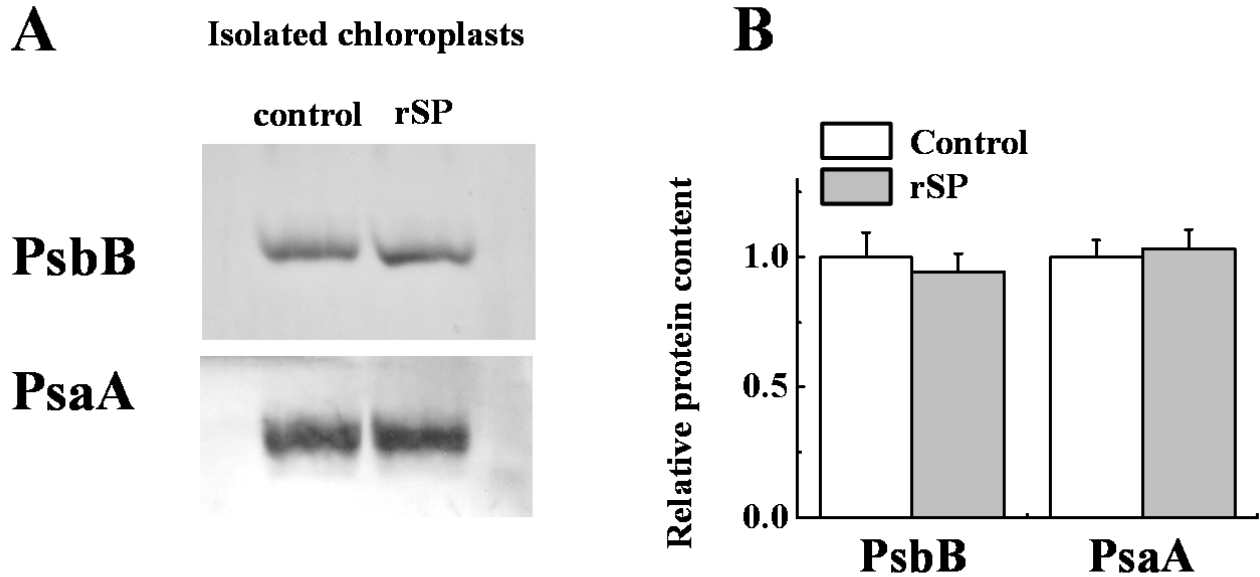

51

52 **Supplemental Figure S2**

53 The comparison of PSII and PSI core protein content in isolated chloroplast between  
 54 before and after SP treatment. (A) Isolated chloroplasts before rSP treatment were used  
 55 as a control, and isolated chloroplasts treated rSP treatment for 1h were used as an rSP  
 56 treated sample. We used antiserum specific to PsbB and PsaA for quantifying PSII and  
 57 PSI core protein content. The protein corresponding to 0.6  $\mu\text{g}$  chlorophyll was loaded in  
 58 each lane. The relative protein content is quantified (B). The protein content in control  
 59 sample was set to 1. White bars indicate the protein content in control sample, and gray  
 60 bars indicate the protein content in rSP treated sample. Data are expressed as the mean  $\pm$   
 61 SEM of three independent experiments.

62

63

64

65

66

67

68  
69  
70  
71

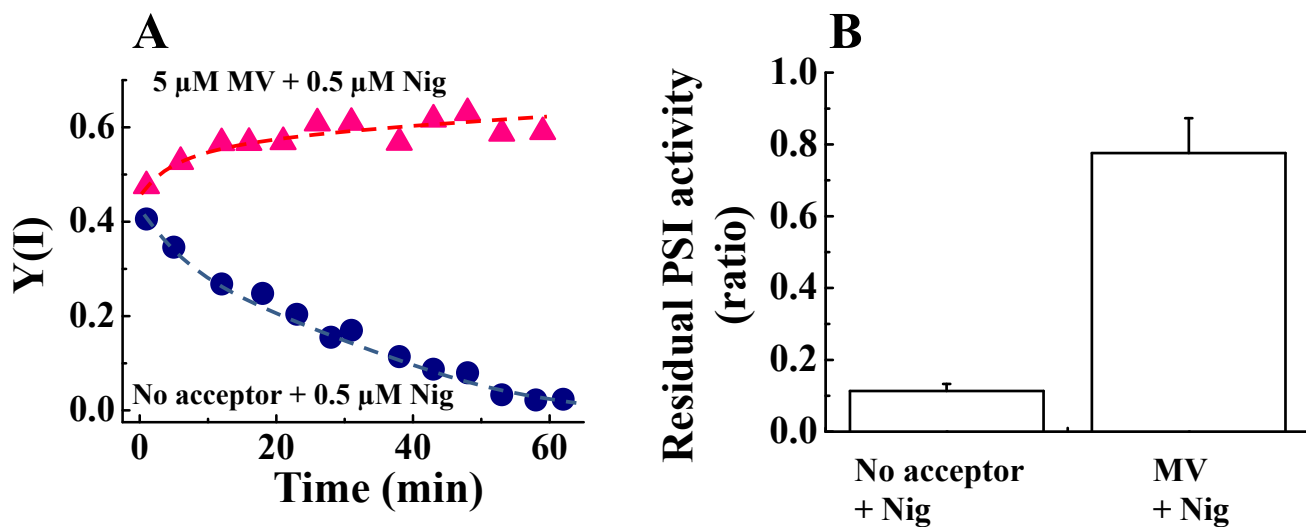

72  
73  
74  
75  
76  
77  
78  
79  
80  
81  
82  
83  
84  
85  
86  
87  
88  
89  
90

### Supplemental Figure S3

The effect of nigericin on rSP treatment in the absence and presence of MV. The reaction mixture contains  $30 \mu\text{g ml}^{-1}$  isolated chloroplasts and  $0.5 \mu\text{M}$  nigericin, and the reaction mixture was maintained at  $25^\circ\text{C}$ . (A) The time-course analysis of Y(I) in isolated chloroplasts in the absence and presence of MV ( $5 \mu\text{M}$ ). Experiments were repeated at least three times and representative data are shown. (B) The residual activity of PSI after rSP treatment in the absence and presence of MV. After rSP treatment, the reaction mixture was kept in the dark for 30 min and the Pm was measured. Data were normalized to the Pm before rSP treatment, and the data represents the residual activity of PSI after rSP treatment. Data are expressed as mean  $\pm$  SEM of three independent experiments.

91  
92  
93

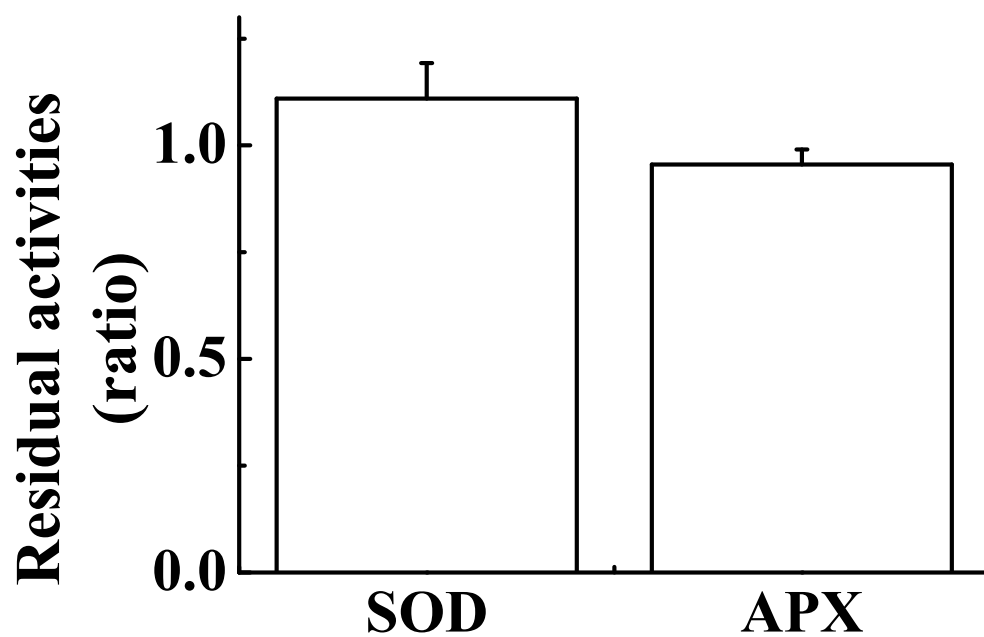

94  
95 **Supplemental Figure S4**  
96 The change in SOD and APX activities before and after rSP treatment. Chloroplastic  
97 SOD and APX activities were compared before and after rSP treatment and the residual  
98 activities are their ratio. Data are expressed as mean  $\pm$  SEM of at least nine independent  
99 experiments. Absolute SOD activities were  $233 \pm 49$  mU (mg Chl)<sup>-1</sup>, and absolute APX  
100 activities were  $5.6 \pm 0.7$   $\mu$ mol (mg Chl)<sup>-1</sup> min<sup>-1</sup>.

101  
102  
103  
104  
105  
106  
107

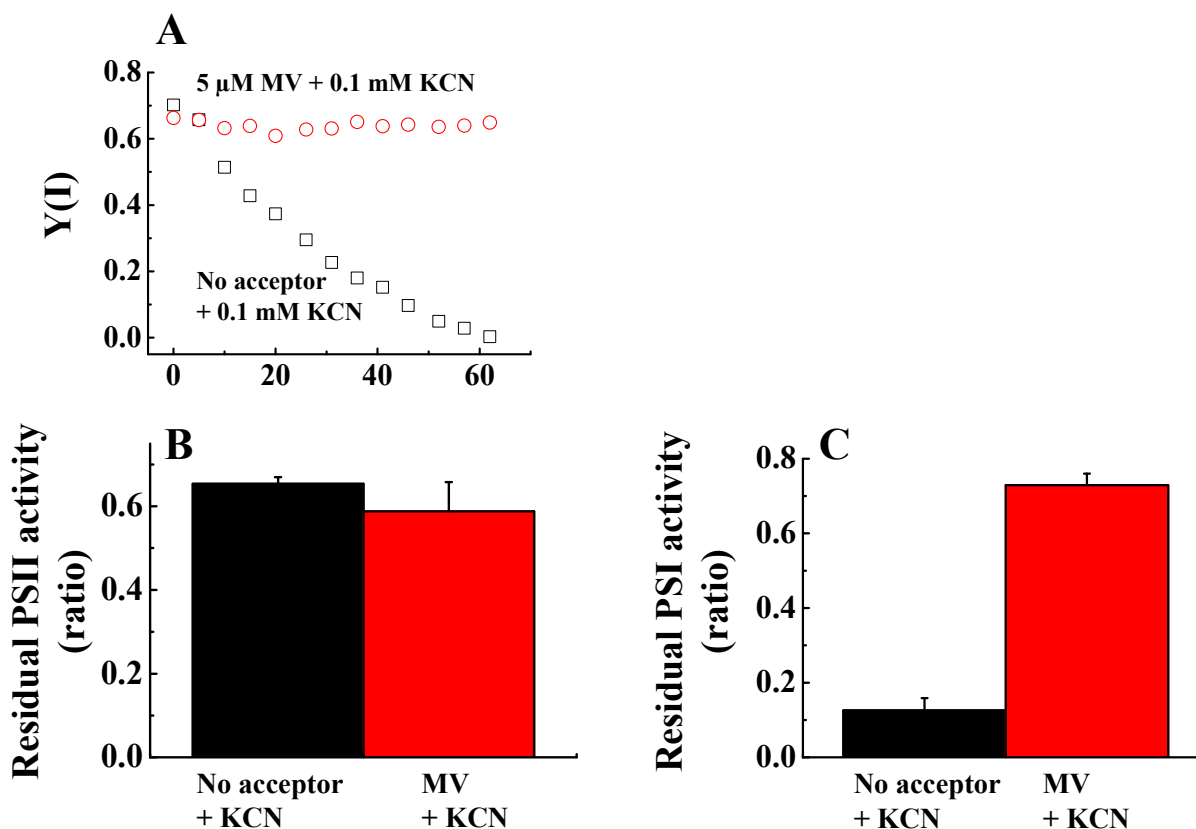

109

110

111 | **Supplemental Figure S5**

112 The effect of KCN on rSP treatment in the absence and presence of MV. The reaction  
 113 mixture contains 30  $\mu$ g ml<sup>-1</sup> isolated chloroplasts and 0.1 mM nigericin, and the reaction  
 114 mixture was maintained at 25°C. (A) The time-course analysis of Y(I) in isolated  
 115 chloroplasts in the absence and presence of MV (5  $\mu$ M). Experiments were repeated at  
 116 least three times and representative data are shown. (B) The residual activity of PSII  
 117 after rSP treatment in the absence and presence of MV. (C) The residual activity of PSI  
 118 after rSP treatment in the absence and presence of MV. After rSP treatment, the reaction  
 119 mixture was kept in the dark for 30 min and the Fv/Fm and Pm were measured. Data  
 120 were normalized to the Fv/Fm and Pm before rSP treatment, and the data represents the  
 121 residual activity of PSII and PSI after rSP treatment. Data are expressed as mean  $\pm$  SEM  
 122 of three independent experiments.

123

124  
125  
126  
127  
128

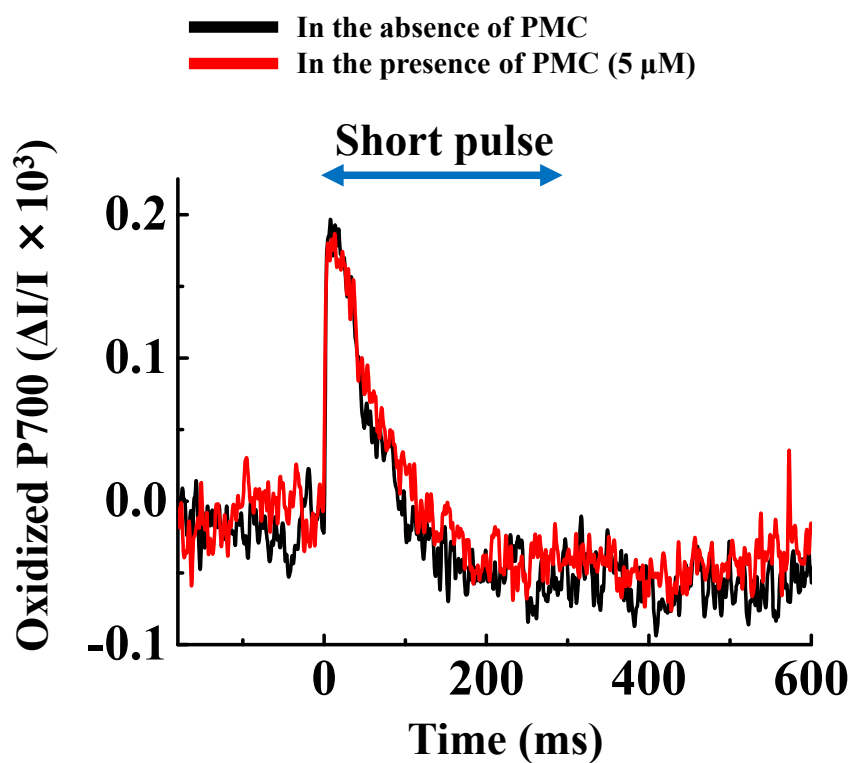

129  
130  
131  
132  
133  
134  
135  
136  
137

### Supplemental Figure S6

The kinetics of oxidized P700 induced by a short-pulse in the absence of and in the presence of PMC (5  $\mu\text{M}$ ). The reaction mixture contained 30  $\mu\text{g ml}^{-1}$  isolated chloroplasts, and the reaction mixture was maintained at 25°C. The data were obtained after rSP treatment was applied for 5 min. Black line shows the condition in the absence of PMC. Red line shows the condition in the presence of PMC. Experiments were at least three times. Short-pulse was illuminated every 10 s, and averaged data during three short-pulse illuminations were shown.
