# Supplementary material
Source: PubMed Central journal article supplement (PMC4936555)
Supplement: supp_pp.16.00246_PP2016-00246DR1_Supplemental_Tables.pdf [file supp_pp.16.00246_PP2016-00246DR1_Supplemental_Tables.pdf]

1 **Supplementary Tables**

2

3 **Title: Superoxide and singlet oxygen produced within the thylakoid membranes both**  
4 **cause photosystem I photoinhibition**

5 Running title: The photoinhibition mechanism in Photosystem I

6

7 **Authors**

8 Daisuke Takagi, Shigeo Takumi, Masaki Hashiguchi, Takehiro Sejima, Chikahiro  
9 Miyake\*

10

11 **Author's address**

12 Department of Biological and Environmental Science, Graduate School of Agricultural  
13 Science, Kobe University, 1-1 Rokkodai, Nada, Kobe, 657-8501 Japan (D.T., S.T.,  
14 M.H., T.S., C.M.)

15 Core Research for Environmental Science and Technology, Japan Science and  
16 Technology Agency, 7 Gobancho, Chiyoda-ku, Tokyo 102-0076, Japan (C.M.)

17

18 \*For correspondence

19 Corresponding author: Chikahiro Miyake

20 (fax; +81-78-803-5851, [cmiyake@hawk.kobe.u-ac.jp](mailto:cmiyake@hawk.kobe.u-ac.jp))

21

22

23

24

25

26

27

28

29

30

31

32

33

34

35

36

37

38

### Supplemental Table S1

#### Oxygen evolution rate and Y(II) in the absence and in the presence of PMC

|                                                                                                             | control           | +PMC (5 $\mu$ M)  |
|-------------------------------------------------------------------------------------------------------------|-------------------|-------------------|
| <b>O<sub>2</sub> absorption rate</b><br>[ $\mu$ mol O <sub>2</sub> (mg Chl) <sup>-1</sup> h <sup>-1</sup> ] | 2.87 $\pm$ 0.69   | 2.65 $\pm$ 0.51   |
| <b>Y(II)</b>                                                                                                | 0.035 $\pm$ 0.022 | 0.035 $\pm$ 0.013 |

39

40

41 Isolated chloroplasts were illuminated by red light (500  $\mu$ E m<sup>-2</sup> s<sup>-1</sup>) and steady state O<sub>2</sub>  
42 evolution rate and Y(II) were measured in the absence of and in the presence of PMC (5  
43  $\mu$ M) in the reaction mixture. The reaction mixture contained 30  $\mu$ g ml<sup>-1</sup> isolated  
44 chloroplasts, and the reaction mixture was maintained at 25°C. Data are expressed as  
45 mean  $\pm$  SEM of three independent experiments.

46

47

48

49

50
